# Supplementary material for: Hydrological Impact of the New ECMWF Multi-Layer Snow Scheme
Source: MDPI journal article supplement (doi:10.3390/atmos13050727), 2022-05-02
Supplement: s1 [file s1]

Archive with 1 entries (1 files):
- atmosphere-1651107-supplementary.pdf
