# Supplementary material for: Hydrological Impact of the New ECMWF Multi-Layer Snow Scheme
Source: MDPI journal article supplement (doi:10.3390/atmos13050727), 2022-05-02
Supplement: s1 [file s1 › atmosphere-1651107-supplementary.pdf]

## Supplementary Materials

# Hydrological Impact of the New ECMWF Multi-Layer Snow Scheme

Ervin Zsoter <sup>1,2,\*</sup>, Gabriele Arduini <sup>1</sup>, Christel Prudhomme <sup>1</sup>, Elisabeth Stephens <sup>3,4</sup> and Hannah Cloke <sup>2,3,5,6</sup>

<sup>1</sup> European Centre for Medium-Range Weather Forecasts, Shinfield Park, Reading RG2 9AX, UK;

gabriele.arduini@ecmwf.int (G.A.); christel.prudhomme@ecmwf.int (C.P.)

<sup>2</sup> Department of Geography and Environmental Science, University of Reading, Reading RG6 6AB, UK;

h.l.cloke@reading.ac.uk

<sup>3</sup> Department of Meteorology, University of Reading, Reading RG6 6BB, UK;

elisabeth.stephens@reading.ac.uk

<sup>4</sup> Red Cross Red Crescent Climate Centre, 2593 HT The Hague, The Netherlands

<sup>5</sup> Department of Earth Sciences, Uppsala University, 752 36 Uppsala, Sweden

<sup>6</sup> Centre of Natural Hazards and Disaster Science, CNDS, 752 36 Uppsala, Sweden

\* Correspondence: ervin.zsoter@ecmwf.int

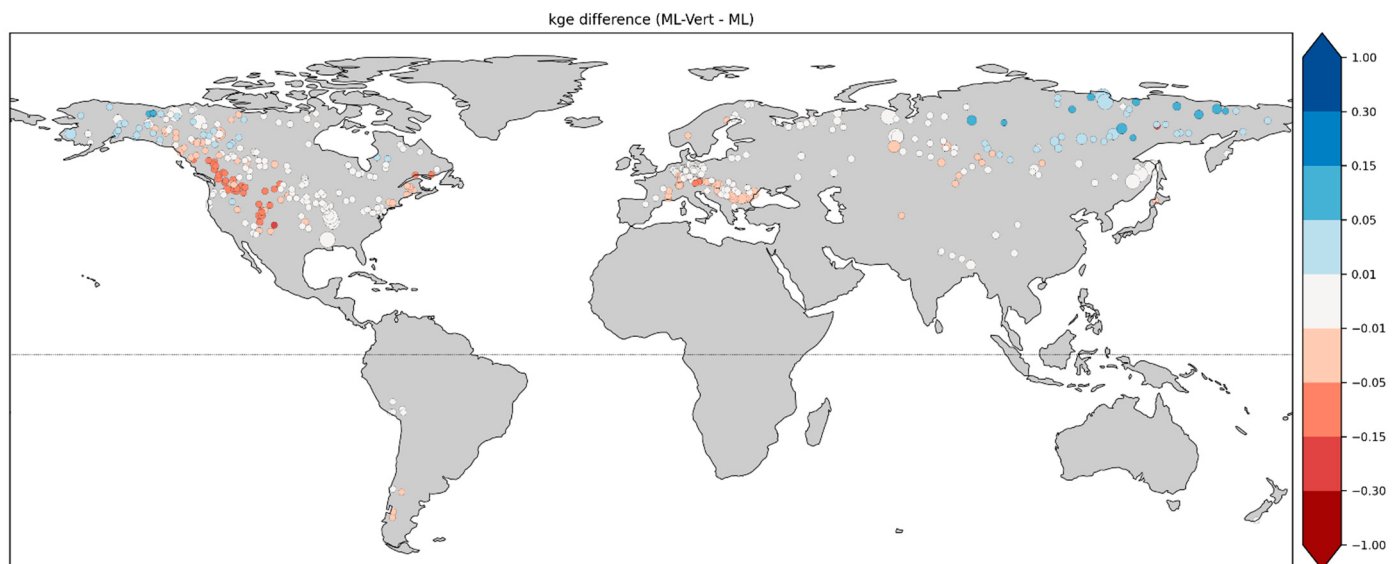

**Figure S1.** Difference of the Kling-Gupta efficiency (kge) between ML-Vert, the experiment with modified snow vertical discretisation over complex terrain with at least 25 cm snow depth, and ML, the default multi-layer experiment, across all 453 stations, calculated on daily river discharge over 1980–2018. Improvements in ML-Vert are indicated by blue dots. Size of the dots represent the catchment area.

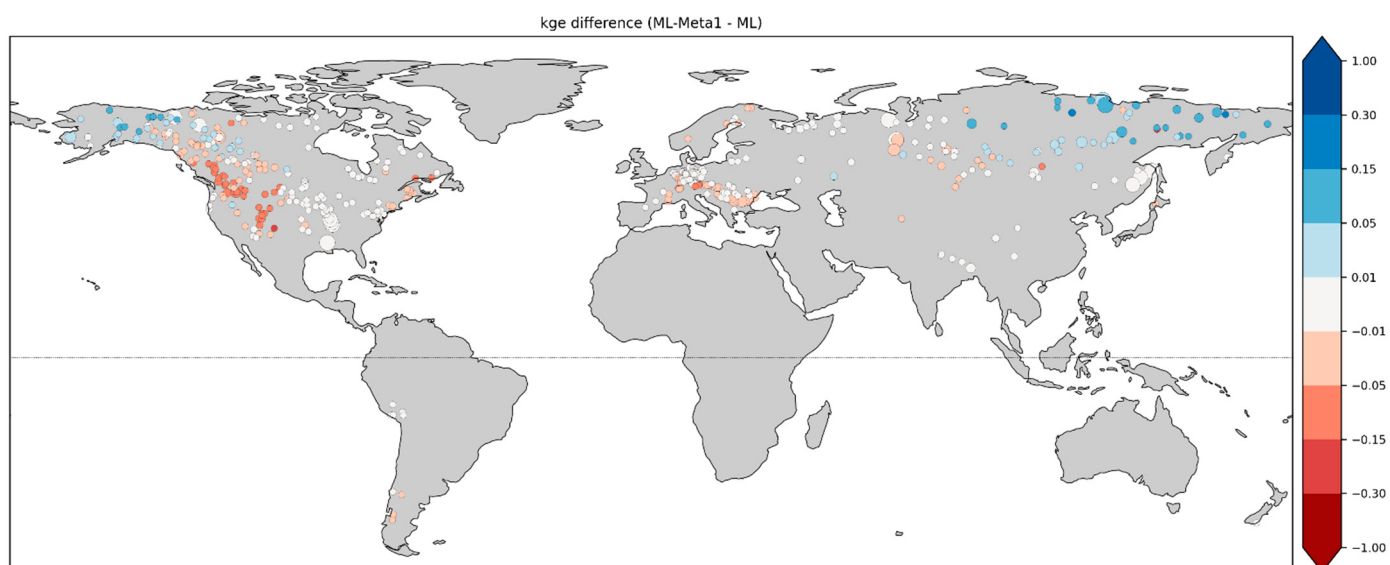

**Figure S2.** As Figure S1, but  $kge$  difference between ML-Meta1 (the 1<sup>st</sup> modification of the destructive metamorphism of the snow with variable  $c_{\xi}$  parameter values across the snow layers, together with ML-Vert) and ML.

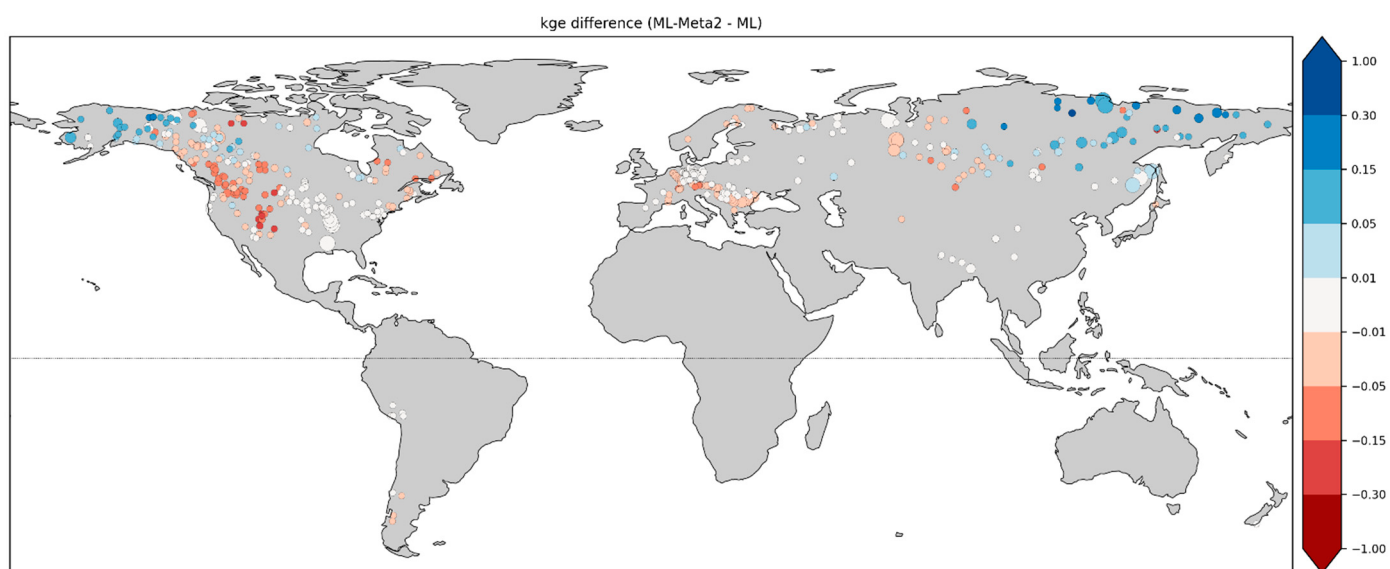

**Figure S3.** As Figure S1, but  $kge$  difference between ML-Meta2 (the 2<sup>nd</sup> modification of the destructive metamorphism of the snow with one  $c_{\xi}$  parameter value as in Anderson et al. 1976, together with ML-Vert) and ML.

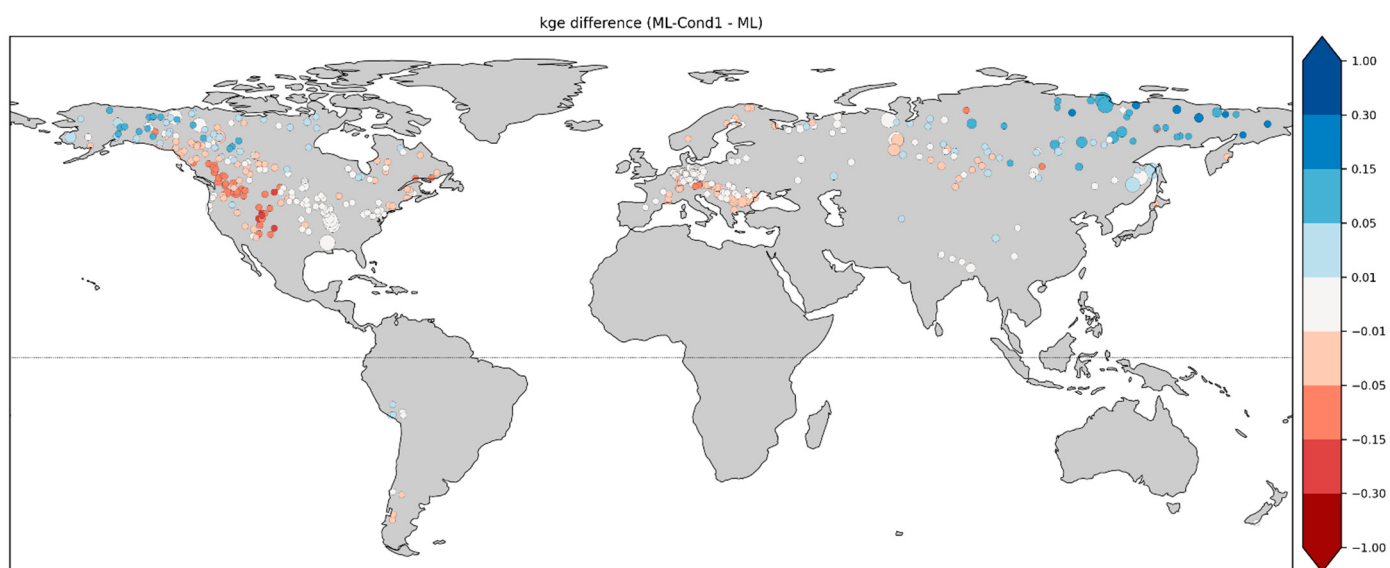

**Figure S4.** As Figure S1, but  $k_{ge}$  difference between ML-Cond1 (ML-Meta1 together with the snow-soil thermal conductivity computation with the revised parameter  $l_b = 0.5$ ) and ML.

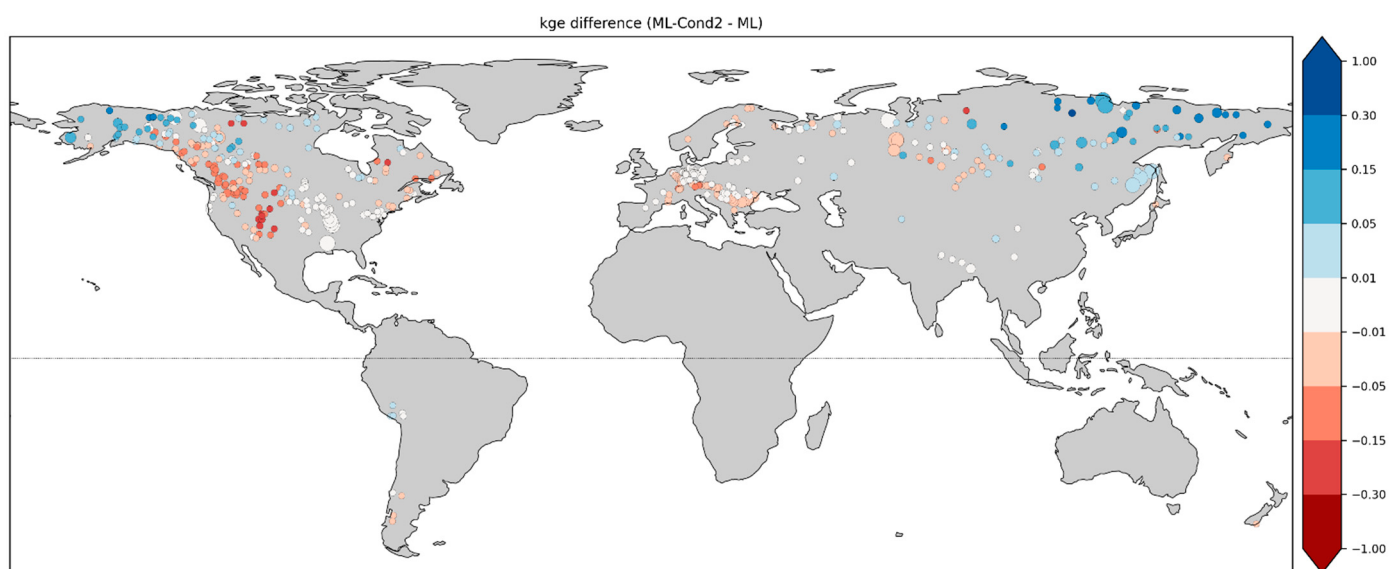

**Figure S5.** As Figure S1, but  $k_{ge}$  difference between ML-Cond2 (ML-Meta2 together with the snow-soil thermal conductivity computation with the revised parameter  $l_b = 0.5$ ) and ML.

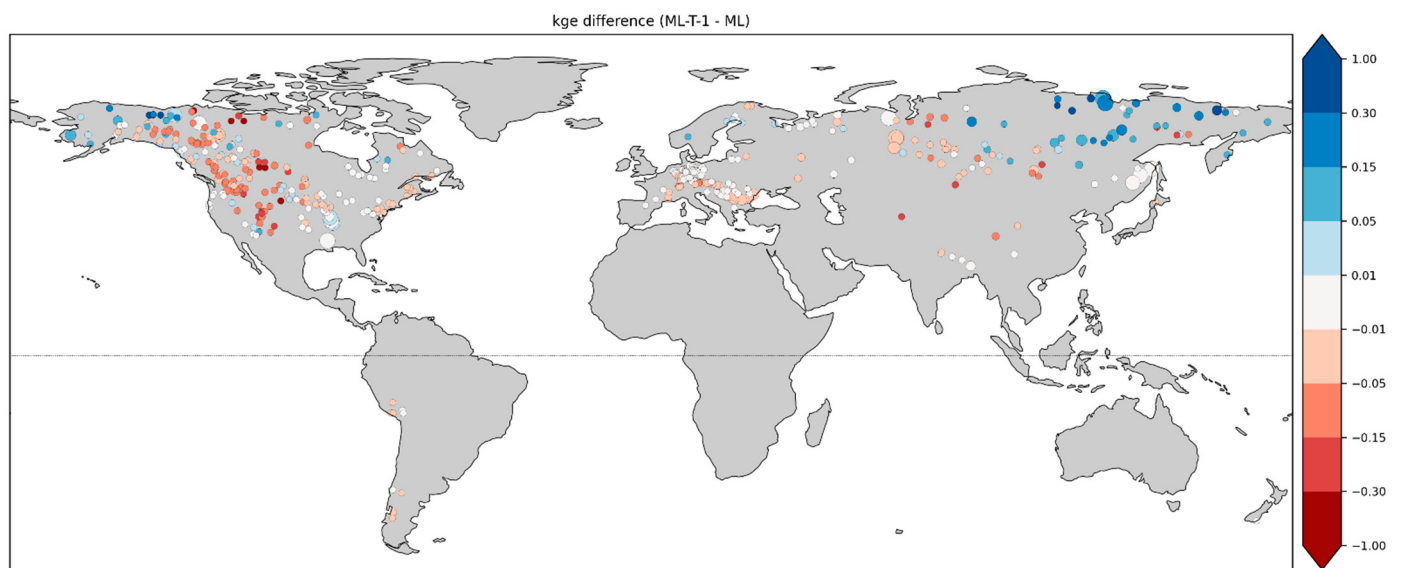

**Figure S6.** As Figure S1, but *kge* difference between ML-T-1 (change of the soil freeze parameter  $T_{Fr}$  from the default -3 to -1 °C added onto ML-Meta1) and ML.

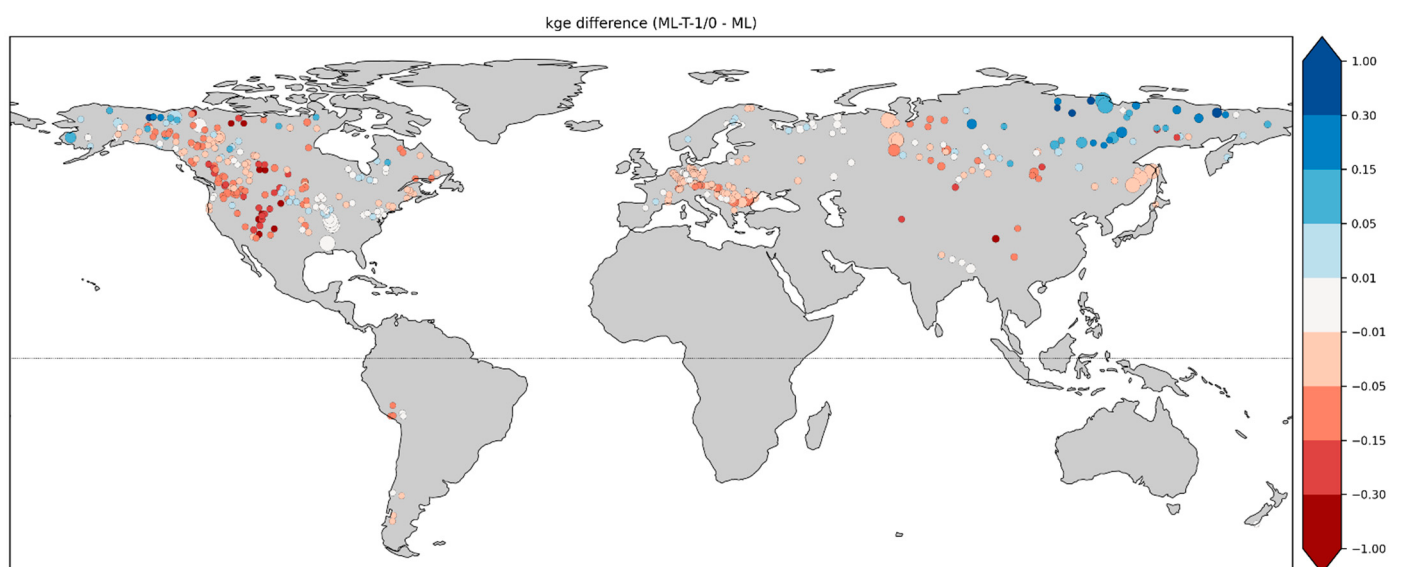

**Figure S7.** As Figure S1, but *kge* difference between ML-T-1/0 (change of the freeze temperature  $T_{Fr}$  to -1 °C and thaw temperature  $T_{Th}$  from the default +1 to 0 °C, added onto ML-Meta1) and ML.

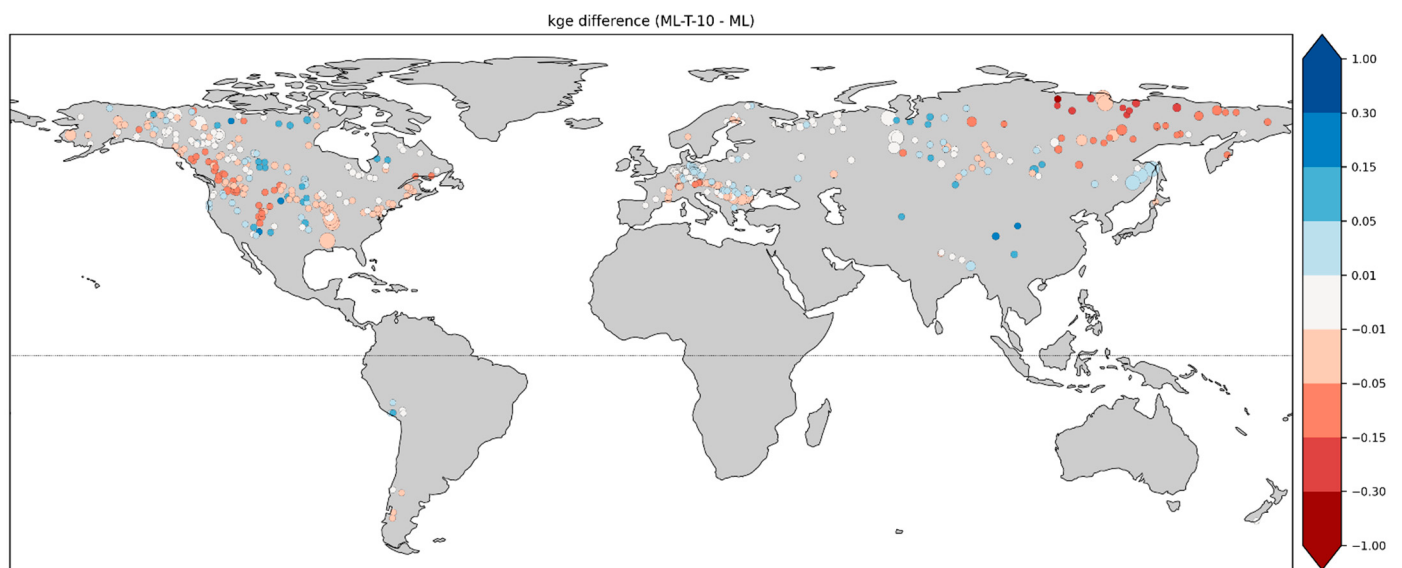

**Figure S8.** As Figure S1, but  $kge$  difference between ML-T10 ( $[T_{Fr}, T_{Th}]$  changed to  $[-10.5, -10]$ , added onto ML-Meta1) and ML.

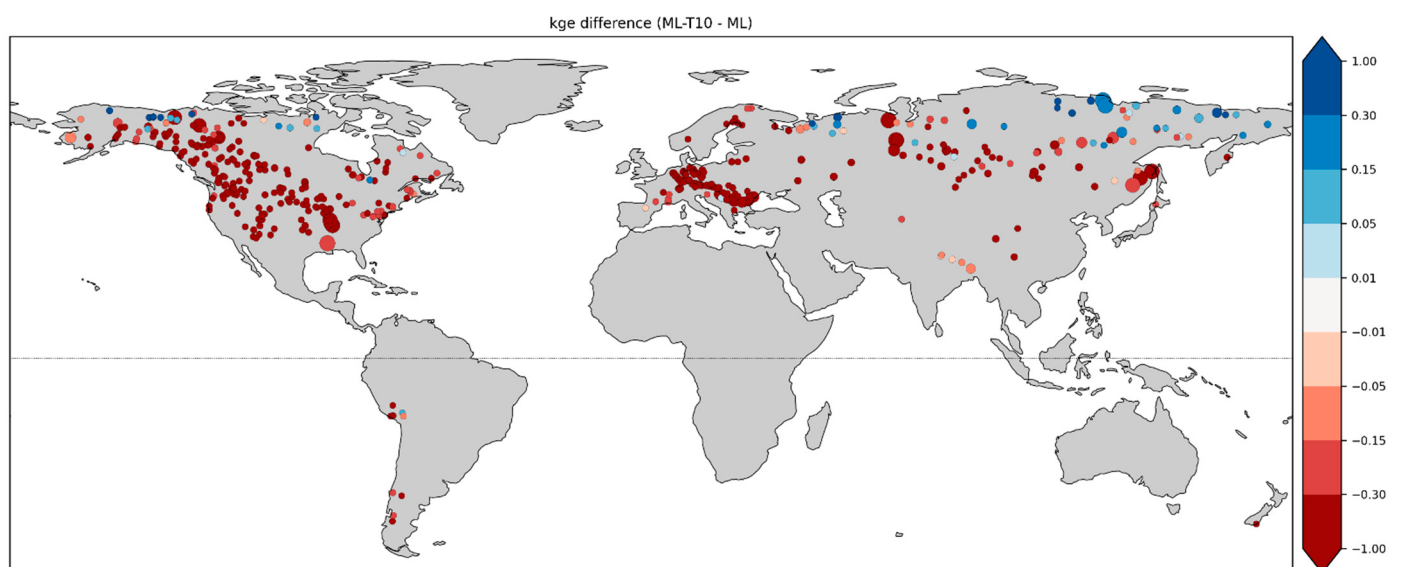

**Figure S9.** As Figure S1, but  $kge$  difference between ML-T10 ( $[T_{Fr}, T_{Th}]$  changed to  $[+10, +10.5]$ , added onto ML-Meta1) and ML.
